# Supplementary material for: One pot synthesis of amine-functionalized and angular-shaped superparamagnetic iron oxide nanoparticles for MR/fluorescence bimodal imaging application
Source: Royal Society of Chemistry journal article supplement (doi:10.1039/c6ra28495g), 2017-01-01
Supplement: c6ra28495g1.pdf [file c6ra28495g1.pdf]

## Supporting Information

# One pot synthesis of amine-functionalized and angular-shaped superparamagnetic iron oxide nanoparticles for MR/fluorescence bimodal imaging applications

Donggeon Yoo,<sup>‡a</sup> Chaedong Lee,<sup>‡a</sup> Bokyung Seo<sup>a</sup> and Yuanzhe Piao<sup>\*a,b</sup>

*<sup>a</sup>Program in Nano Science and Technology, Graduate School of Convergence Science and Technology, Seoul National University, 145 Gwanggyo-ro, Yeongtong-gu, Suwon-si, Gyeonggi-do, 443-270, South Korea. Fax: +82-31-8889148; Tel: +82-31-8889141; E-mail: parkat9@snu.ac.kr*

*<sup>b</sup>Advanced Institutes of Convergence Technology, 145 Gwanggyo-ro, Yeongtong-gu, Suwon-si, Gyeonggi-do, 443-270, South Korea.*

<sup>†</sup> Footnotes relating to the title and/or authors should appear here.

Electronic Supplementary Information (ESI) available:

DOI: 10.1039/x0xx00000x

<sup>‡</sup> These authors contributed equally.

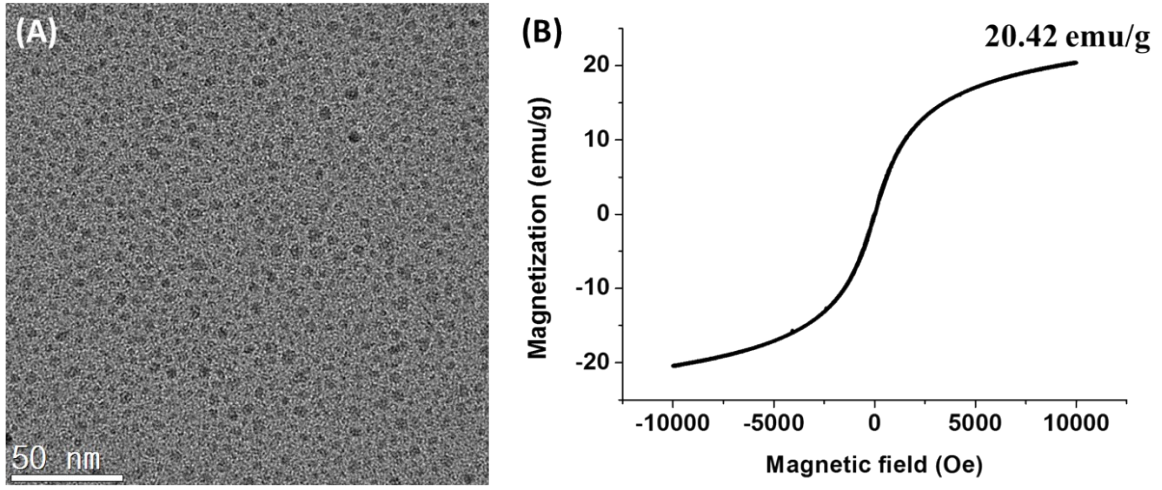

**Fig. S1** TEM image and SQUID magnetization measurement of the reproduced USPIO.

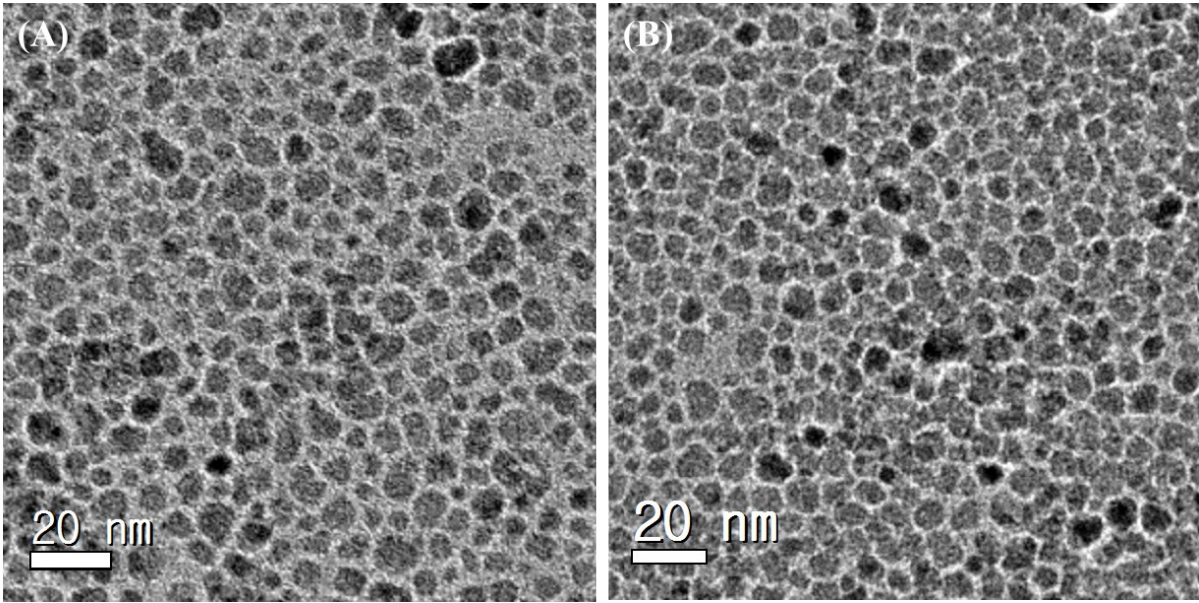

**Fig. S2** TEM images of synthesized IONPs in PEG solvent with (A) KBr and (B) NaCl.

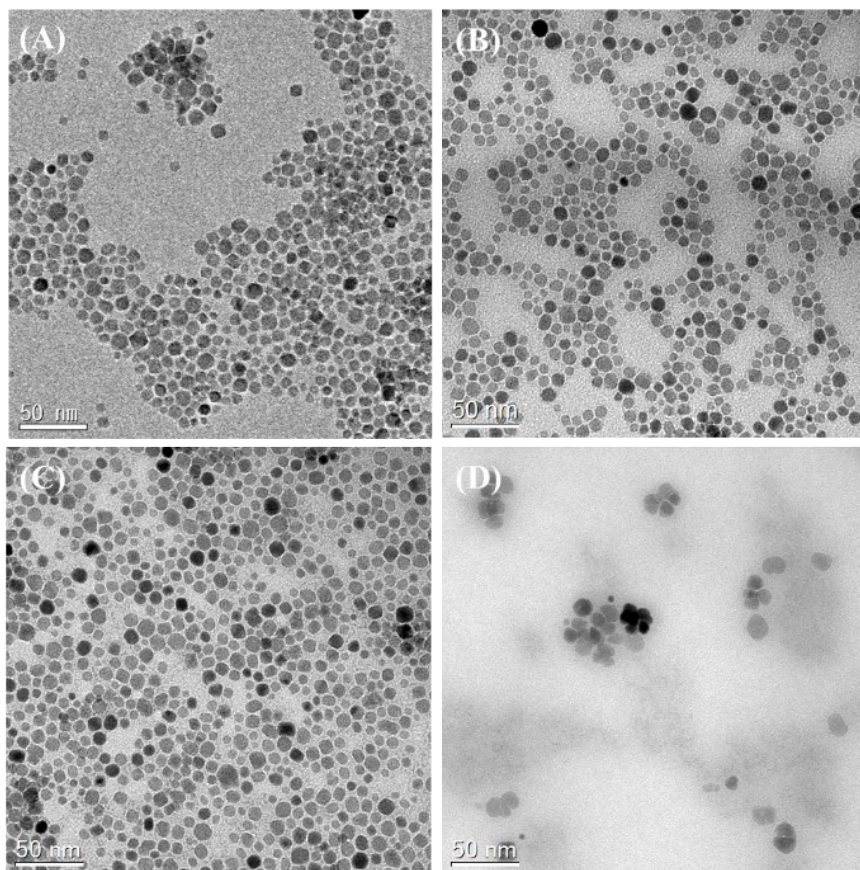

**Fig. S3** TEM images of synthesized A-SPIONs with various amount of NaCl, (A): 0 mmol, (B): 1 mmol, (C): 3 mmol, (D): 5 mmol

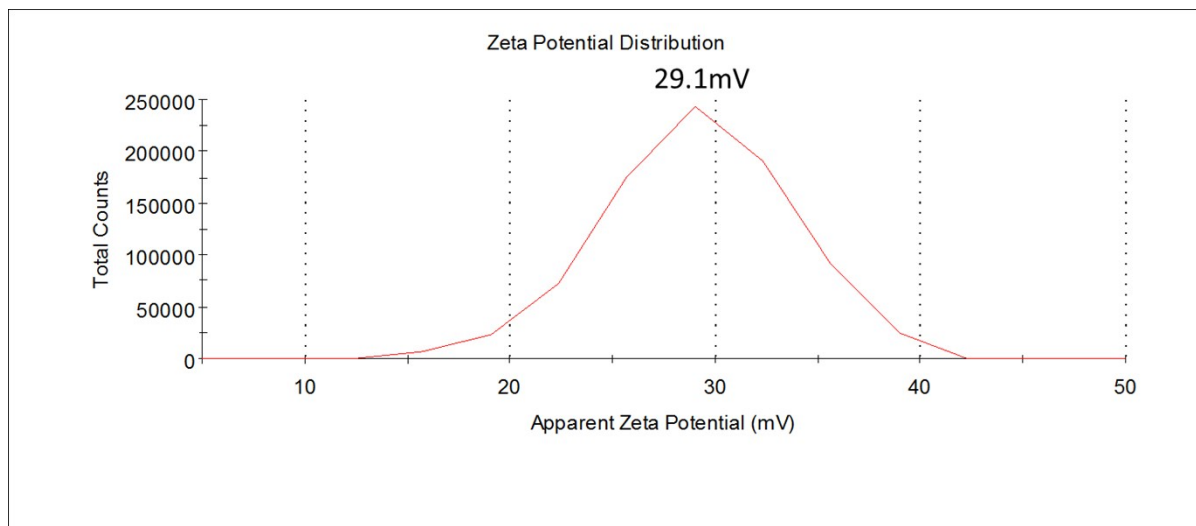

**Fig. S4** Surface charge of the as-prepared A-SPIONs.

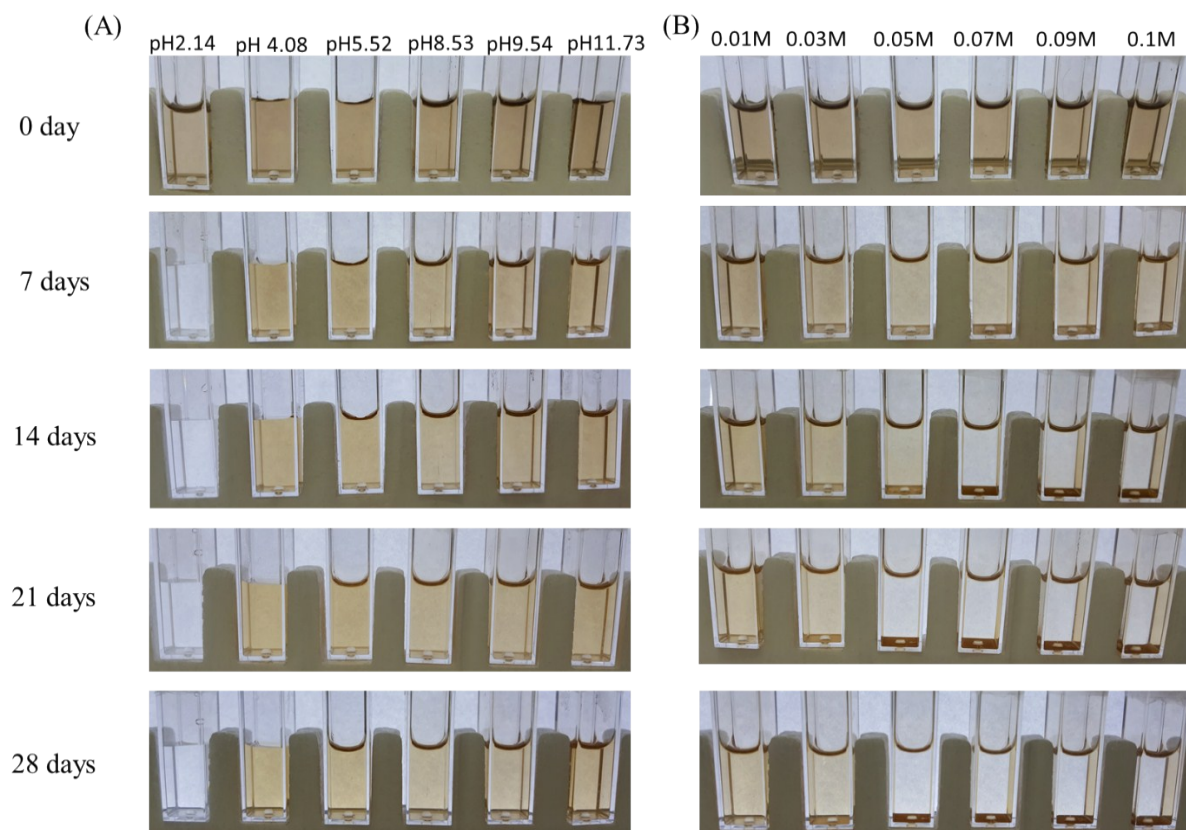

**Fig. S5** Photographs of as-prepared A-SPIONs in various (A) pH and (B)NaCl concentration.

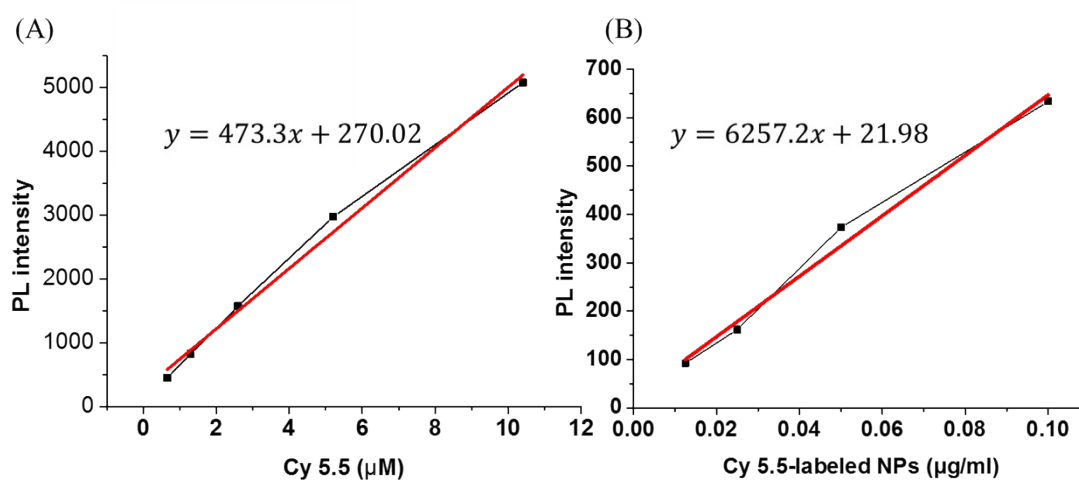

**Fig. S6** Standard curves of Cy 5.5 and Cy5.5-labeled A-SPIONs as a function of concentration (Em.  $\lambda=675\text{nm}$ ).



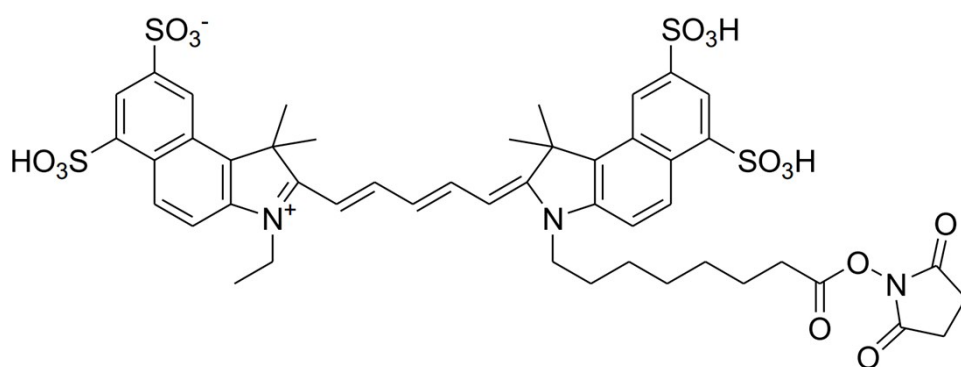

**Fig. S7** Chemical structure of Flamma® 675 NHS ester.
